# Supplementary material for: Dietary Supplementation of a Live Yeast Product on Dairy Sheep Milk Performance, Oxidative and Immune Status in Peripartum Period
Source: PubMed Central journal article supplement (PMC7761757; doi:10.3390/jof6040334), 2020-12-03
Supplement: jof-06-00334-s001.pdf [file jof-06-00334-s001.pdf]

**Table S1.** Analysis of variance in blood  $\beta$ -hydroxybutyric acid in prepartum and postpartum period.

|                | Control           |                 | ActiSaf           |                 | Effect       |
|----------------|-------------------|-----------------|-------------------|-----------------|--------------|
|                | $\bar{X}$         | $\pm$ Std Error | $\bar{X}$         | $\pm$ Std Error | Sig.         |
| Prepartum day  | -15.3             | 0.55            | -17.0             | 0.49            | 0.220        |
| B-BHA mmol/L   | 0.86 <sup>a</sup> | 0.07            | 0.63 <sup>b</sup> | 0.06            | <b>0.018</b> |
| Postpartum day | +11.5             | 0.33            | +11.9             | 0.52            | 0.520        |
| B-BHA mmol/L   | 0.67 <sup>a</sup> | 0.04            | 0.56 <sup>b</sup> | 0.03            | <b>0.028</b> |

Significance level below 0.05 indicates significant difference between treatments.

**Table S2.** Repeated measure analysis of variance in blood  $\beta$ -hydroxybutyric acid in overall experimental period using prepartum and postpartum sampling time as repeated factor.

|  | Diets (D)    |                   |                   | Sampling Time (T) |                   |                   | Effect |              |              |
|--|--------------|-------------------|-------------------|-------------------|-------------------|-------------------|--------|--------------|--------------|
|  | Control      | ActiSaf           | SEM               | Prepartum         | Postpartum        | SEM               | D      | T            | DxT          |
|  | B-BHA mmol/L | 0.77 <sup>a</sup> | 0.59 <sup>b</sup> | 0.041             | 0.74 <sup>a</sup> | 0.61 <sup>b</sup> | 0.033  | <b>0.003</b> | <b>0.016</b> |

Significance level below 0.05 indicates significant difference between treatments.

**Table S3.** Analysis of variance in body weight at the start of the experiment, at lambing, and at the end.

|                 | Control   |                 | ActiSaf   |                 | Effect |
|-----------------|-----------|-----------------|-----------|-----------------|--------|
|                 | $\bar{X}$ | $\pm$ Std Error | $\bar{X}$ | $\pm$ Std Error | Sig.   |
| BW start (Kg)   | 61.5      | 1.42            | 61.5      | 1.41            | 0.997  |
| BW lambing (Kg) | 58.5      | 0.97            | 57.6      | 1.17            | 0.566  |
| BW end (Kg)     | 60.5      | 0.97            | 61.0      | 1.11            | 0.697  |

Significance level below 0.05 indicates significant difference between treatments, while those close to 0.999 no significant.

**Table S4.** Repeated measure analysis of variance in body weight in overall experimental period using the weighing at the start of the experiment, at lambing, and at the end, as repeated factor.

|  | Diets (D) |         |      | Sampling Time (T) |                   |                   |                   | Effect |       |              |
|--|-----------|---------|------|-------------------|-------------------|-------------------|-------------------|--------|-------|--------------|
|  | Control   | ActiSaf | SEM  | Start             | Lambing           | End               | SEM               | D      | T     | DxT          |
|  | BW (Kg)   | 60.1    | 60.0 | 1.09              | 61.5 <sup>b</sup> | 58.0 <sup>a</sup> | 60.8 <sup>b</sup> | 0.73   | 0.950 | <b>0.000</b> |

Significance level below 0.05 indicates significant difference between treatments, while those close to 0.999 no significant.

**Table S5.** Analysis of variance in body weight recovery from lambing to 6 weeks postpartum.

|                  | Control   |                 | ActiSaf   |                 | Effect |
|------------------|-----------|-----------------|-----------|-----------------|--------|
|                  | $\bar{X}$ | $\pm$ Std Error | $\bar{X}$ | $\pm$ Std Error | Sig.   |
| BW recovery (Kg) | 2.00      | 0.31            | 3.44      | 0.28            | 0.092  |

Significance level below 0.05 indicates significant difference between treatments, while those close to 0.999 no significant.

**Figure S1.** Graphical representation of milk chemical composition of the Control and ActiSaf group. Error bars represent the Standard Error of Means.

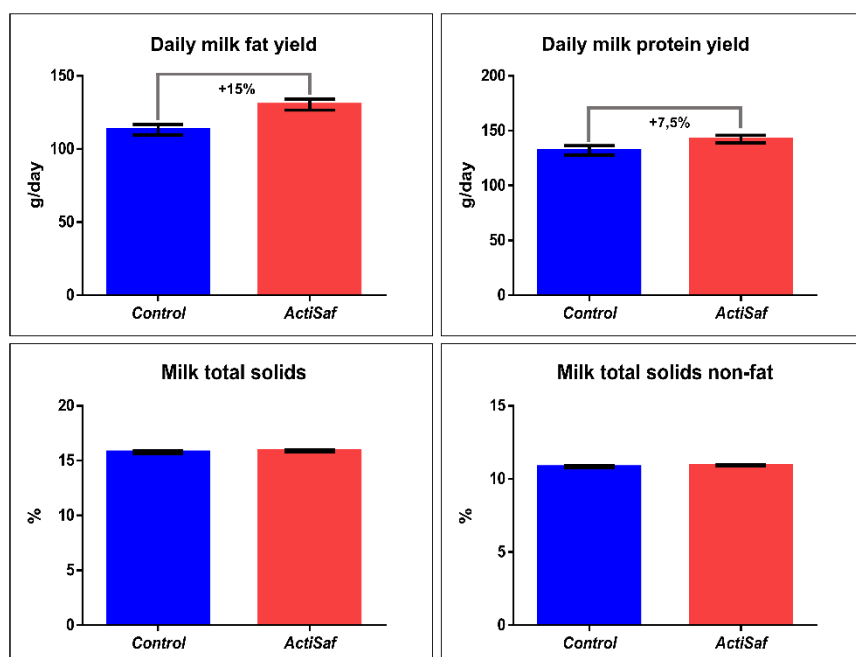

**Table S6.** Milk yield and milk chemical composition of ewes fed the Control diet and ActiSaf in the six sampling times.

|                            | Diets (D) |         |       | Sampling Time (T) in weeks |                     |                    |                    |                    |                    | Effect |              |       |       |
|----------------------------|-----------|---------|-------|----------------------------|---------------------|--------------------|--------------------|--------------------|--------------------|--------|--------------|-------|-------|
|                            | Control   | ActiSaf | SEM   | 1                          | 2                   | 3                  | 4                  | 5                  | 6                  | SEM    | D            | T     | DxT   |
| <b>Milk yield Kg</b>       | 2.50      | 2.69    | 0.159 | 2.02 <sup>a</sup>          | 2.46 <sup>b</sup>   | 2.67 <sup>c</sup>  | 2.90 <sup>d</sup>  | 2.79 <sup>e</sup>  | 2.71 <sup>c</sup>  | 0.127  | 0.395        | 0.000 | 0.001 |
| <b>FCM<sub>6%</sub> Kg</b> | 2.07      | 2.32    | 0.126 | 2.20 <sup>ad</sup>         | 2.00 <sup>b</sup>   | 2.16 <sup>ac</sup> | 2.34 <sup>d</sup>  | 2.21 <sup>cd</sup> | 2.24 <sup>cd</sup> | 0.103  | 0.161        | 0.003 | 0.131 |
| <b>ECM Kg</b>              | 1.93      | 2.13    | 0.116 | 1.94 <sup>ab</sup>         | 1.88 <sup>a</sup>   | 2.02 <sup>b</sup>  | 2.21 <sup>c</sup>  | 2.08 <sup>bd</sup> | 2.00 <sup>d</sup>  | 0.093  | 0.231        | 0.000 | 0.141 |
| <b>Fat %</b>               | 4.94      | 5.00    | 0.117 | 6.90 <sup>a</sup>          | 4.67 <sup>b</sup>   | 4.54 <sup>b</sup>  | 4.55 <sup>b</sup>  | 4.43 <sup>b</sup>  | 4.71 <sup>b</sup>  | 0.138  | 0.740        | 0.000 | 0.239 |
| <b>Fat g/day</b>           | 114       | 131     | 7.188 | 136 <sup>ad</sup>          | 110 <sup>b</sup>    | 117 <sup>bc</sup>  | 128 <sup>cd</sup>  | 119 <sup>cd</sup>  | 123 <sup>dc</sup>  | 6.240  | <b>0.104</b> | 0.000 | 0.056 |
| <b>Protein %</b>           | 5.54      | 5.37    | 0.131 | 6.43 <sup>a</sup>          | 5.36 <sup>b</sup>   | 5.17 <sup>c</sup>  | 5.27 <sup>cd</sup> | 5.16 <sup>c</sup>  | 5.32 <sup>bd</sup> | 0.045  | 0.381        | 0.000 | 0.100 |
| <b>Protein g/day</b>       | 133       | 143     | 8.228 | 123 <sup>ab</sup>          | 130 <sup>a</sup>    | 137 <sup>b</sup>   | 152 <sup>c</sup>   | 142 <sup>c</sup>   | 143 <sup>c</sup>   | 6.599  | 0.434        | 0.000 | 0.355 |
| <b>Lactose %</b>           | 4.94      | 5.13    | 0.104 | 4.61 <sup>a</sup>          | 5.39 <sup>abc</sup> | 4.99 <sup>b</sup>  | 5.03 <sup>b</sup>  | 5.07 <sup>c</sup>  | 5.12 <sup>bc</sup> | 0.083  | 0.239        | 0.000 | 0.284 |
| <b>TS %</b>                | 15.73     | 15.89   | 0.151 | 18.03 <sup>a</sup>         | 15.51 <sup>b</sup>  | 15.23 <sup>b</sup> | 15.38 <sup>b</sup> | 15.13 <sup>b</sup> | 15.59 <sup>b</sup> | 0.159  | 0.470        | 0.000 | 0.346 |
| <b>TSNF %</b>              | 10.81     | 10.91   | 0.058 | 10.98                      | 10.85               | 10.73              | 10.84              | 10.79              | 10.94              | 0.044  | 0.261        | 0.116 | 0.762 |

**Table S7.** Sequences of primers for target genes used in real-time qPCR.

| Gene                           | Sequence                                                               | Accession No.* |
|--------------------------------|------------------------------------------------------------------------|----------------|
| <i>GAPDH</i>                   | F: 5'-AAAGCCATCACCATCTTCCA -3'<br>R: 5'-ACCACGTA CT CAGCACCTCAT -3'    | NM_001190390.1 |
| <i>YWHAZ</i>                   | F: 5'-TGTTCTATTGTGCCTAGTACACTGT -3'<br>R: 5'-CATCAAGACTCACTGCCTCCC -3' | NM_001267887.1 |
| <i>IL-1<math>\beta</math></i>  | F: 5'-TGGATAGCCCATGTGTGCTG -3'<br>R: 5'-CAGAACACCACTTCTCGGCT -3'       | NM_001009465.2 |
| <i>IL2</i>                     | F: 5'-AAATCCCGAGAACCTCAAGCT -3'<br>R: 5'-TGTAGCGTTAACCTTGGGCA -3'      | NM_001009806.1 |
| <i>IL6</i>                     | F: 5'-CAGCAAGGAGACTGGCAGA -3'<br>R: 5'-TCCATCTTTTTCTCCATTTTTGG -3'     | NM_001009392.1 |
| <i>IL8</i>                     | F: 5'-CCTGCTCTCTGCAGCTCTGTG -3'<br>R: 5'-TGCATTGGCATCGAAGTTCTG -3'     | NM_001009401.2 |
| <i>IL10</i>                    | F: 5'-CTGGGGGAGAAGCTGAAGAC -3'<br>R: 5'-CTCTCTTCACCTGCTCCACC -3'       | NM_001009327.1 |
| <i>IFN<math>\gamma</math></i>  | F: 5'-AAATCCGGTGGATGATCTG -3'<br>R: 5'-ACCATTACATTGATGCTCTCC -3'       | NM_001009803   |
| <i>TNF<math>\alpha</math></i>  | F: 5'-GGGAGACACAACTAAGGGCT -3'<br>R: 5'-AACCTGCAGTTCAGCTCCG -3'        | NM_001024860   |
| <i>NF-<math>\kappa</math>B</i> | F: 5'-AAGCTGTGGTGGAGGACTTG -3'<br>R: 5'-ACAGAGTTACCCAAGCGGTC -3'       | AF283892.1     |
| <i>CXCL-5</i>                  | F: 5'-CAAGTGCTCCATGGCAGCAG -3'<br>R: 5'-GTTGGCGCACACCTGACG -3'         | XM_004012452.3 |
| <i>CXCL-16</i>                 | F: 5'-GTGCCTGTGTTGTCCCTCTT -3'<br>R: 5'-GCTTGCACACCACGTAGAGT -3'       | XM_015098600.1 |

\*Ref Seq: NCBI Reference Sequence database
